# Supplementary material
Source: publisher figshare collection journal article supplement (https://gsajournals.figshare.com/ndownloader/files/20187276)
Supplement: Supplementary file 1 [file 20187276]

**Table S2: Phenotype comparisons of *cbp80* mutant, *cbp80-*complemented and wild-type plant lines**

| **Plant line** | **Transition to flowering**  (days on soil) | **Height**  (cm) | **Diameter rosette leaves**  (cm) | **Seed set**  (mg/plant) |
| --- | --- | --- | --- | --- |
| **WT T line**  (n=12) | **12.1**  **(10-16)** | **36.2**  **(31.1-38.6)** | **8.2**  **(5.5-9.6)** | **165.6**  (**125.9-192.6)** |
| ***cbp80***  (n=15)  (n1=14) | **11.8**  **(9-16)** | **27.1**  (**18.5-34.7)** | **5.5**  **(4-7.4)** | **98.5**  **(77.6-128.7)** |
| ***cbp80 complemented***  (n=12) | **9.8**  **(9-11)** | **36.8**  **(33.7-39.5)** | **6.4**  **(4.5-8.5)** | **123.5**  **(92.5-154.9)** |

n: number of plants

n1: In the column ‘Transition to flowering’ one *cbp80* mutant plant failed to flower in a timely manner and was excluded from the calculation of average and range

To compare phenotypes of the *cbp80* mutant and complemented plantsto the wild-type T line (WT T), we grew fifteen, twelve, and twelve plants, respectively, from each genotype on soil to maturity and seed set. The features listed above were scored for individual plants. Photos of representative plants of the same genotypes are shown in **Figure S5**. The averages and ranges (in parentheses) of the assessed values are shown in bold.
